# Supplementary material for: Membrane-Deformation Ability of ANKHD1 Is Involved in the Early Endosome Enlargement
Source: PubMed Central journal article supplement — iScience. 2019 Jun 18;17:101–18. doi: 10.1016/j.isci.2019.06.020 (PMC6606961; doi:10.1016/j.isci.2019.06.020), 2019-06-18

**ISCI, Volume 17**

**Supplemental Information**

**Membrane-Deformation Ability of ANKHD1  
Is Involved in the Early Endosome Enlargement**

**Manabu Kitamata, Kyoko Hanawa-Suetsugu, Kohei Maruyama, and Shiro Suetsugu**

## **Transparent Methods**

### **Antibodies**

The following antibodies were used: rabbit anti-GFP antibody (MBL Life Science, 598), rabbit anti-ANKHD1 antibody (Atlas Antibodies, HPA008718), mouse anti-EEA1 antibody (BD Biosciences, 610456), rabbit anti-EEA1 (Cell Signaling Technology, 3288), mouse anti-GAPDH antibody (Santa Cruz Biotechnology, sc-166574), mouse anti-GM130 antibody (BD Biosciences, 610822), mouse anti-Bcl-2 antibody (BD Biosciences, 610538), mouse anti-Calnexin antibody (Santa Cruz Biotechnology, sc-23954), mouse anti-mCherry antibody (Novus, NBP1-96752), mouse anti-Rab5 antibody (Santa Cruz Biotechnology, sc-46692), mouse anti-LAMP1 antibody (Santa Cruz Biotechnology, sc-20011), and mouse anti-Tom20 antibody (Santa Cruz Biotechnology, sc-17764).

### **Plasmids**

Glutathione S-transferase (GST)-tagged human ANKHD1 fragments of 195–1418 aa (ARD25) were amplified by PCR using the following primers: 5'-GAAGATCTGCAGAAAACAGCCACAATG-3' and 5'-GAAGATCTTTAGTCTTTAGCCTTCACAATG-3'. They were then inserted into the pCold vector (TaKaRa Bio) at the BamH1 restriction site.

To prepare the pVenus×3 vector, EGFP in the pEGFP-N3 vector was replaced with Venus×3. The vector backbone of the pEGFP-N3 vector was amplified by the following primers: 5'-TAAAGCGGCCGCGACTCTAG-3' and 5'-GGTGGCGATGGATCCCGGG-3'. Each Venus cDNA was amplified by the following primers:

5'-CCGGGATCCATCGCCACCATGGTGAGCAAGGGCGAG-3' and 5'-GGCAGATCTGAGTCCGGACTTGTACAGCTCGTCCATG -3'.

5'- TCCGGACTCAGATCTGCCACCGCGGTGAGCAAGGGCGAGGAG-3' and 5'-CGCGGTGGCGATGGATCCGCTCTTGTACAGCTCGTCCATGC-3'.

5'-GCGGATCCATCGCCACCGCGGTGAGCAAGGGCGAGGAGC-3' and 5'-CTAGAGTCGCGGCCGCTTTACTTGTACAGCTCGTCCATGC-3'.

These four fragments were assembled using the Gibson Assembly Master Mix (New England BioLabs).

The pVenus×3-ANKHD1 plasmid was prepared by assembly using Gibson Assembly Master Mix. The five cDNA fragments included cDNA of full-length ANKHD1, three Venus cDNAs, and the backbone of pEGFP-N3 vector. The backbone of pEGFP-N3 vector was amplified by PCR with the primers: 5'-TAAAGCGGCCGCGACTCTAG-3' and 5'-ATCAGTCAGCATGGTGGCAGATCTGAGTCCGGTAGCGC-3'.

The three Venus sequences were amplified by PCR with the following primers: 5'-TCTCAAATATGTCAACAGCGGATCCATCGCCACCGCGGTGAGCAAGGGCG-3' and 5'-GGCAGATCTGAGTCCGGACTTGTACAGCTCGTCCATG-3', 5'-TCCGGACTCAGATCTGCCACCGCGGTGAGCAAGGGCGAGGAG-3' and 5'-CGCGGTGGCGATGGATCCGCTTTGTACAGCTCGTCCATGC-3', 5'-AGCGGATCCATCGCCACCGCGGTGAGCAAGGGCGAGGAGC-3' and 5'-CTAGAGTCGCGGCCGCTTTACTTGTACAGCTCGTCCATGC-3'.

The ANKHD1 cDNA was amplified by PCR with the following primers: 5'-GAAGATCTGCCACCATGCTGACTGATAGCGGAGG and GAAGATCTGTTGACATATTTGAGATGC-3'. The amplified cDNA sequence was inserted into the pMD20-T vector using Mighty TA-cloning Kit (TaKaRa Bio) and then extracted by BglII digestion.

To prepare the siRNA resistant constructions of ANKHD1, five silent mutations were induced in each target sequence of three siRNAs: 5'-GGTGGAAACAGCGACTCTGATAAC-3', 5'-GTGACACCAACTCTTTGTCCACCAG-3', and 5'-AGCAGCTGTGCGTGACAAACACCCGG-3'.

### **Protein purification**

Plasmids for expression of GST-fused protein were transformed into Rosetta2 cells (Novagen). The cells were cultured in Luria broth (LB) medium at 37°C, and the proteins were overexpressed using 1 mM isopropyl β-D-1-thiogalactopyranoside overnight at 12°C. The cells were collected and then lysed in a buffer containing 10 mM Tris-HCl (pH 7.5), 150 mM NaCl, 1 mM EDTA, 0.5% Triton X-100 (8 mM), 2 mM 2-mercaptoethanol, and 1 mM phenylmethylsulfonyl fluoride using an ultrasonic

homogenizer. The lysate was centrifuged and the supernatant was incubated with the glutathione-sepharose 4B beads. The beads were washed four times using approximately 10-fold dilutions in 10 mM Tris-HCl (pH 7.5), 150 mM NaCl, 1 mM EDTA, and 1 mM dithiothreitol (DTT), and protein was collected by cleavage from the GST tag by precision protease at 4°C overnight.

### **Preparation of liposomes**

PC (Sigma-Aldrich, P3841), PE (Sigma-Aldrich, P7693), PS (Sigma-Aldrich P5660), and porcine brain Folch fractions (Avanti) were dissolved in chloroform and mixed using defined weigh ratios to 0.2 mg/ml concentration of total lipid. Rhodamine-PE (Avanti, 810150) was incorporated at 0.2%. The lipids were dried under nitrogen gas and subsequently maintained under vacuum for 20 min to remove residual chloroform. The dried lipids were suspended in buffer containing 10 mM Tris-HCl (pH 7.5), 150 mM NaCl, and 1 mM EDTA and then incubated for 1 hr at 37°C. In Figure S10, liposomes were extruded 11 times with 800 nm polycarbonate filters using an extruder (Avanti).

### **Liposome sedimentation assay**

The protein aggregates were removed by ultracentrifugation before incubation with liposomes. The prepared liposomes (0.2 mg/ml) were incubated with the proteins in buffer containing 10 mM Tris-HCL (pH 7.5), 150 mM NaCl, 1 mM EDTA, and 0.5 mM DTT for 30 min at room temperature. After incubation, these reaction solutions were centrifuged at  $109000 \times g$  for 20 min to examine the vesiculation and at  $245000 \times g$  for 20 min to examine the membrane binding at room temperature in a TLA-100 rotor (Beckman). The supernatant and the pellet fractions were separated, and SDS-PAGE sample buffer was added into these fractions to the same volume, and then analyzed by SDS-PAGE. The fluorescence of rhodamine-PE was measured using an FLA-8000 fluorescence image analyzer (Fuji-Film). The band intensities were quantified by ImageJ software.

### **Electron microscopy**

Proteins were incubated with liposomes (0.2 mg/ml) prepared as described above in a

buffer containing 10 mM Tris-HCl (pH 7.5), 150 mM NaCl, and 1 mM EDTA. After incubation for 20 min at 25°C, a formvar-coated grid was put on the reaction mixture, washed with 100 mM HEPES (pH 7.5), and then stained with 0.5% uranyl acetate for 30 s. The grid was observed by transmission electron microscopy using a model H-7100 microscope (Hitachi).

### **Crosslinking analysis**

Proteins were incubated with or without liposomes (0.2 mg/ml) in buffer containing 10 mM HEPES (pH 8.0), 150 mM NaCl, 1 mM EDTA, and 0.5 mM DTT for 30 min at room temperature. The mix solution was incubated with BS(PEG)5 (Thermo Fisher Scientific, 21581) for 30 min at room temperature. The reaction was quenched by adding SDS-PAGE sample buffer and then analyzed by SDS-PAGE.

### **Transfection and siRNA treatment**

HeLa, HEK293T, Caki-1, U2OS, and DLD1 cells were cultured in Dulbecco's modified Eagle's medium containing 10% fetal bovine serum with penicillin and streptomycin at 37°C in an atmosphere of 5% CO<sub>2</sub>. One day before transfection, 5×10<sup>4</sup> cells were seeded in wells of 6-well dishes. The cells were transfected using Lipofectamine 3000 (Invitrogen). After 24 hr of transfection, the cells were analyzed.

Knockdown of ANKHD1 was performed with stealth RNAi (Invitrogen). The siRNA sequences were 5'-CAGGUGGGAAUAGUGAUUCAGAUAA-3', 5'-GAAGUGACUCCUAAUUCUUGUCA-3', and 5'-CAGUCAGCAACUGUGUGUCACUAAU-3'. These siRNAs were mixed and transfected using Lipofectamine 3000. The stealth RNAi siRNA Negative Control (Invitrogen) was also transfected as a control. One day before transfection of siRNA, 5×10<sup>4</sup> cells were seeded in wells of 6-well dishes, and then siRNA was transfected into the cells. After 48 hr of transfection, the cells were analyzed.

### **Immunostaining**

HeLa cells were fixed in 4% paraformaldehyde for 10 min, permeabilized in a buffer containing 0.1% Triton X-100, 50 mM Tris-HCl (pH 7.5), and 100 mM NaCl for 10 min, and then blocked in 1% bovine serum albumin, 50 mM Tris-HCl (pH 7.5), and 100

mM NaCl for 1 hr. The cells were incubated with primary antibody in buffer containing 1% BSA, 50 mM Tris-HCl (pH 7.5), and 100 mM NaCl for 1 hr. After washing with PBS, the cells were incubated with secondary antibodies conjugated with Alexa Fluor 488 and 568 in buffer containing 1% BSA, 50 mM Tris-HCl (pH 7.5), and 100 mM NaCl for 1 hr. The cells were washed using PBS and mounted in ProLong Diamond Antifade Mountant (Invitrogen).

All fluorescence images were acquired by confocal microscopy (FV1000D, Olympus). A 100× immersion objective lens (NA 1.40, Olympus) was used for live cell and fixed cell imaging. Z-stack images were captured at 0.4 μm intervals.

### **Live cell imaging**

Mitochondria were stained with 200 nM Mitotracker Red CM-H<sub>2</sub>Xros (Molecular Probes, M7513) at 37°C in an atmosphere of 5% CO<sub>2</sub> for 45 min. Lysosomes were stained using 75 nM LysoTracker Red DND-99 (Molecular Probes, L7528) at 37°C in an atmosphere of 5% CO<sub>2</sub> for 1 hr. Live cells were observed by confocal microscopy at 37°C in the 5% CO<sub>2</sub> atmosphere.

### **Quantification of organelle area**

The number of puncta, average area, and total area of organelles per cell were calculated from images with the focal plane in the vicinity of coverslips, where the area of the cell is the largest, using ImageJ software. Images of the organelles were converted into binary images and set in equal thresholds in each experiment. Then, the minimal particles size was set to 0.04 μm<sup>2</sup> and evaluated by the *Analyze Particles* function in the ImageJ software.

### **Quantification of colocalization in cells**

The percentages of colocalization per cell in Figure 3, Figure S6, and Figure S7 were calculated using the *Colocalization Threshold* function in the ImageJ software. Colocalization represented the overlap with green and red channel intensities above a threshold and indicates the pixels that have both channels. The percentages of colocalization were calculated as the number of pixels that had both channels / total number of pixels of each channel. Fluorescence images were set in equal thresholds in

each experiment.

### **Statistical analysis**

Statistical differences were analyzed using paired two tailed Student's *t*-test in Figure 1, Figure 2B, Figure 5, Figure 6, Figure 7B, Figure S4, Figure S6B and Figure S10.

Unpaired two tailed Student's *t*-test were performed in Figures 2D-2E, Figures 2G-2H, Figure 2J, Figure 2L, Figure 3, Figure 4, Figures 7D-7F, Figure 8, Figure S5, Figures S6D-S6H, Figure S8, and Figure S9. *P*-values and the number of repeated experiments are described in the figures and figure legends. All error bars represent standard error.

## **Supplemental Figure Legends.**

### **Figure S1. Domain structure of 18 ARDs containing fragments and these EST frequencies, Related to Figure 1.**

(A) Illustration of the ankyrin repeat proteins. The 18 ARD fragments, surrounded by red lines, were used in Figure 1.

(B) Average EST frequencies (TPM: Transcripts per million) of 18 ARDs containing fragments among 78 organs/health states/developmental stages in the Unigene database (<https://www.ncbi.nlm.nih.gov/unigene>).

### **Figure S2. Phylogenetic tree of ankyrin repeats from human 18 ARD proteins, Related to Figure 1.**

Phylogenetic tree of ankyrin repeats from human 18 ARD proteins is shown. The amino acid sequences of the ankyrin repeats within each protein are compared in the highly transcribed human 18 ARD proteins (Figure S1). Red and blue indicate ANKHD1 and ANKRD17, respectively.

### **Figure S3. Phylogenetic tree of ankyrin repeats from all human proteins, Related to Figure 1.**

Phylogenetic tree of ankyrin repeats of all human proteins from SMART (<http://smart.embl-heidelberg.de>) is shown. The amino acid sequences of ankyrin repeats within each protein are compared in all human proteins. Red indicates ANKHD1. The names of proteins other than ANKHD1 are not shown.

### **Figure S4. Localization of ANKHD1 on EEA1-positive early endosomes in HEK293T, Caki-1, U2OS, and DLD1 and increased EEA1-positive early endosomes in ANKHD1-depleted cells, Related to Figure 2 and Figure 3.**

(A) Effects of ANKHD1 knockdown on the levels of endogenous EEA1 in HEK293T, Caki-1, U2OS, and DLD1 cells treated with control or ANKHD1 siRNA. The whole-cell lysates were subjected to western blotting with anti-EEA1 antibody. GAPDH was examined as the loading control. Data represent the mean of four independent experiments. Error bars represent SE. \* $P < 0.05$  and \*\* $P < 0.01$ . Statistical significance



was determined with the Student's *t*-test.

(B) Confocal microscopy images of endogenous ANKHD1 (green) and EEA1 (red) in HEK293T, Caki-1, U2OS, and DLD1 cells. Arrows indicate colocalization of endogenous ANKHD1 and EEA1. Scale bars, 10  $\mu\text{m}$ . Scale bars in magnification, 2  $\mu\text{m}$ .

**Figure S5. The total area and number of EEA1-positive early endosomes at each focal plane in HeLa cells, Related to Figure 2.**

(A) The z-stack images of EEA1 in HeLa cells. The lower panel shows the z section at the yellow line at the upper panel. The z-stack images were taken at 0.4  $\mu\text{m}$  intervals for the measurement of EEA1 puncta in each focal plane. At the lower panel, the z axis was enlarged five times.

(B-C) The total area (B) and the number (C) of EEA1 puncta per cell in each focal plane were measured by ImageJ software. Confocal slices were taken at 0.4  $\mu\text{m}$  intervals.

Data represent the mean of 14 cells. All error bars represent SE. \* $P < 0.05$ , \*\* $P < 0.01$ , and \*\*\* $P < 0.001$ . Statistical significance was determined with the Student's *t*-test.

**Figure S6. Knockdown of ANKHD1 increases the size of Rab5-positive organelles and the co-localization of Rab5 with EEA1, Related to Figure 2.**

(A) Amounts of endogenous Rab5 in HeLa cells treated with control or ANKHD1 siRNA by western blotting.

(B) Quantification of Rab5 in (A). Data represent the mean of five independent experiments.

(C) Confocal microscopy analysis of endogenous Rab5 in HeLa cells treated with control or ANKHD1 siRNA by immunostaining.

(D-G) The total area (D), the number (E), the size distribution (F), and the average area (G) of Rab5 puncta per cell in (C) were measured by ImageJ software. Data represent the mean of 30 cells from three independent experiments for control siRNA and ANKHD1 siRNA.

(H) Colocalization percentages of endogenous Rab5 with endogenous EEA1 in ANKHD1-depleted cells. Data represent the mean of 7 and 8 cells for control siRNA and ANKHD1 siRNA, respectively.

All error bars represent SE. \* $P < 0.05$ , \*\* $P < 0.01$ , and \*\*\* $P < 0.001$ . Statistical

significance was determined with the Student's *t*-test. ns, not significant. Scale bars, 10  $\mu$ m. Scale bars in magnification, 2  $\mu$ m

**Figure S7. Localization of ANKHD1 in various organelles, Related to Figure 3.**

(A) Confocal microscopy images of endogenous ANKHD1 (green) and Rab5 (red) in HeLa cells. The rectangle in the upper image shows the region of enlargement in the lower images.

(B) Confocal microscopy images of endogenous ANKHD1 (green) and LAMP1 (red) in HeLa cells.

(C) Confocal microscopy images of endogenous ANKHD1 (green) and GM130 (red) in HeLa cells.

(D) Confocal microscopy images of endogenous ANKHD1 (green) and Calnexin (red) in HeLa cells.

(E) Confocal microscopy images of endogenous ANKHD1 (green) and Tom20 (red) in HeLa cells.

(F) Colocalization percentages of endogenous ANKHD1 with Rab5, LAMP1, GM130, Calnexin, or Tom20 per cell in (A-E) calculated using ImageJ software. Data represent the means of 10 (A), 10 (B), 13 (C), 15 (D), and 12 (E) cells. Error bars represent SE. Scale bars, 10  $\mu$ m. Scale bars in magnification, 2  $\mu$ m.

**Figure S8. Knockdown of ANKHD1 does not affect maturation of early endosomes to lysosomes, Related to Figure 2.**

(A) Lysosome morphology stained with LysoTracker was observed in HeLa cells treated with control or ANKHD1 siRNA.

(B-D) Quantification of (B) the number, (C) the average area, and (D) the total area of lysosomes per cell in (A). Data represent the means of 26 and 25 cells from three independent experiments for control siRNA and ANKHD1 siRNA, respectively.

All error bars represent SE. Statistical significance was determined with the Student's *t*-test. ns, not significant. Scale bars, 10  $\mu$ m.

**Figure S9. Effect of ANKHD1 fragments on the total area of organelles, Related to Figure 5.**

(A) Amounts of expressed ANKHD1 fragments in HeLa cells expressing EGFP, N+ARD15-EGFP, ARD10-EGFP, N+ARD25-EGFP, ARD25-EGFP, or ANKHD1-EGFP by western blotting.

(B) Confocal microscopy images of expressed ANKHD1 fragments and endogenous EEA1 in HeLa cells expressing EGFP, N+ARD15-EGFP, N+ARD25-EGFP, ARD25-EGFP, or ANKHD1-EGFP.

(C-D) The total area (C) and the number (D) of EEA1 puncta per cell in (B) was measured using ImageJ software. Data represent the mean of 25, 26, 25, 24, and 26 cells from three independent experiments for EGFP, N+ARD15-EGFP, N+ARD25-EGFP, ARD25-EGFP, and ANKHD1-EGFP, respectively.

(E) Confocal microscopy analysis of endogenous Calnexin in HeLa cells expressing EGFP or N+ARD25-EGFP.

(F) The total area of Calnexin staining per cell in (E) was measured as in (C). Data represent the mean of 22 cells from three independent experiments for EGFP and N+ARD25-EGFP.

(G) Confocal microscopy analysis of mitochondria stained with Mitotracker in HeLa cells expressing EGFP or N+ARD25-EGFP.

(H) The total area of Mitotracker staining per cell in (G) was measured as in (C). Data represent the mean of 22 and 21 cells from three independent experiments for EGFP and N+ARD25-EGFP, respectively.

(I) Confocal microscopy analysis of endogenous GM130 in HeLa cells expressing EGFP or N+ARD25-EGFP.

(J-K) The total area (J) of GM130 staining measured as in (C) and the number of Golgi fragments (K) per cell in (I) are shown. Data represent the mean of 22 cells from three independent experiments for EGFP and N+ARD25-EGFP.

All error bars represent SE.  $*P < 0.05$  and  $**P < 0.01$ . Statistical significance was determined using the Student's *t*-test. ns, not significant. Scale bars, 10  $\mu\text{m}$

**Figure S10. Vesiculation ability of ANKHD1 in filtered liposome and unfiltered liposome is not different, Related to Figure 6.**

(A) Vesiculation by liposome sedimentation assay for N+ARD25 with liposomes extruded through a filter of 800 nm and liposomes without extrusion. Protein

concentration is 50 nM, 150 nM, or 300 nM. The lipid composition of the liposomes was PC : PE : PS : rhodamine-PE at a weight ratio of 4 : 3 : 3 : 0.02.

(B) Quantification of liposomes in (A). The percentage of Rhodamine-PE fluorescence in the supernatant is shown. Data represent the mean of three independent experiments. Error bars represent SE. Statistical significance was determined using the Student's *t*-test. ns, not significant.

**Figure S11. Structural characteristics of the latter 10 ankyrin repeats of ANKHD1, Related to Figure 6.**

(A) Sequence alignment of ankyrin repeats in ANKHD1 by Clustal X. The colors are based in the Clustal X program. Red circles indicate arginine and lysine at position 1 and position 2 in ANKs.

(B) Structural model of the latter 10 ankyrin repeats (1054-1390 aa) predicted by Phyre2 (<http://www.sbg.bio.ic.ac.uk/phyre2>).

(C) Surface electrostatics map of the latter 10 ankyrin repeats (1054-1390 aa) generated by Pymol using the model in (B). The amphipathic helix is also illustrated. The mutated amino acid residues, K1323, K1324, R1357, and K1358, are indicated.

(D) The hydrophobic moment of ANKHD1 calculated using Heliquest. The high score means that the helix is predicted to be an amphipathic helix. Arrow shows the highest hydrophobic moment of 1400-1415 aa in ANKHD1.

(E) The schematic illustration of the membrane deformation by the dimeric ANKHD1.

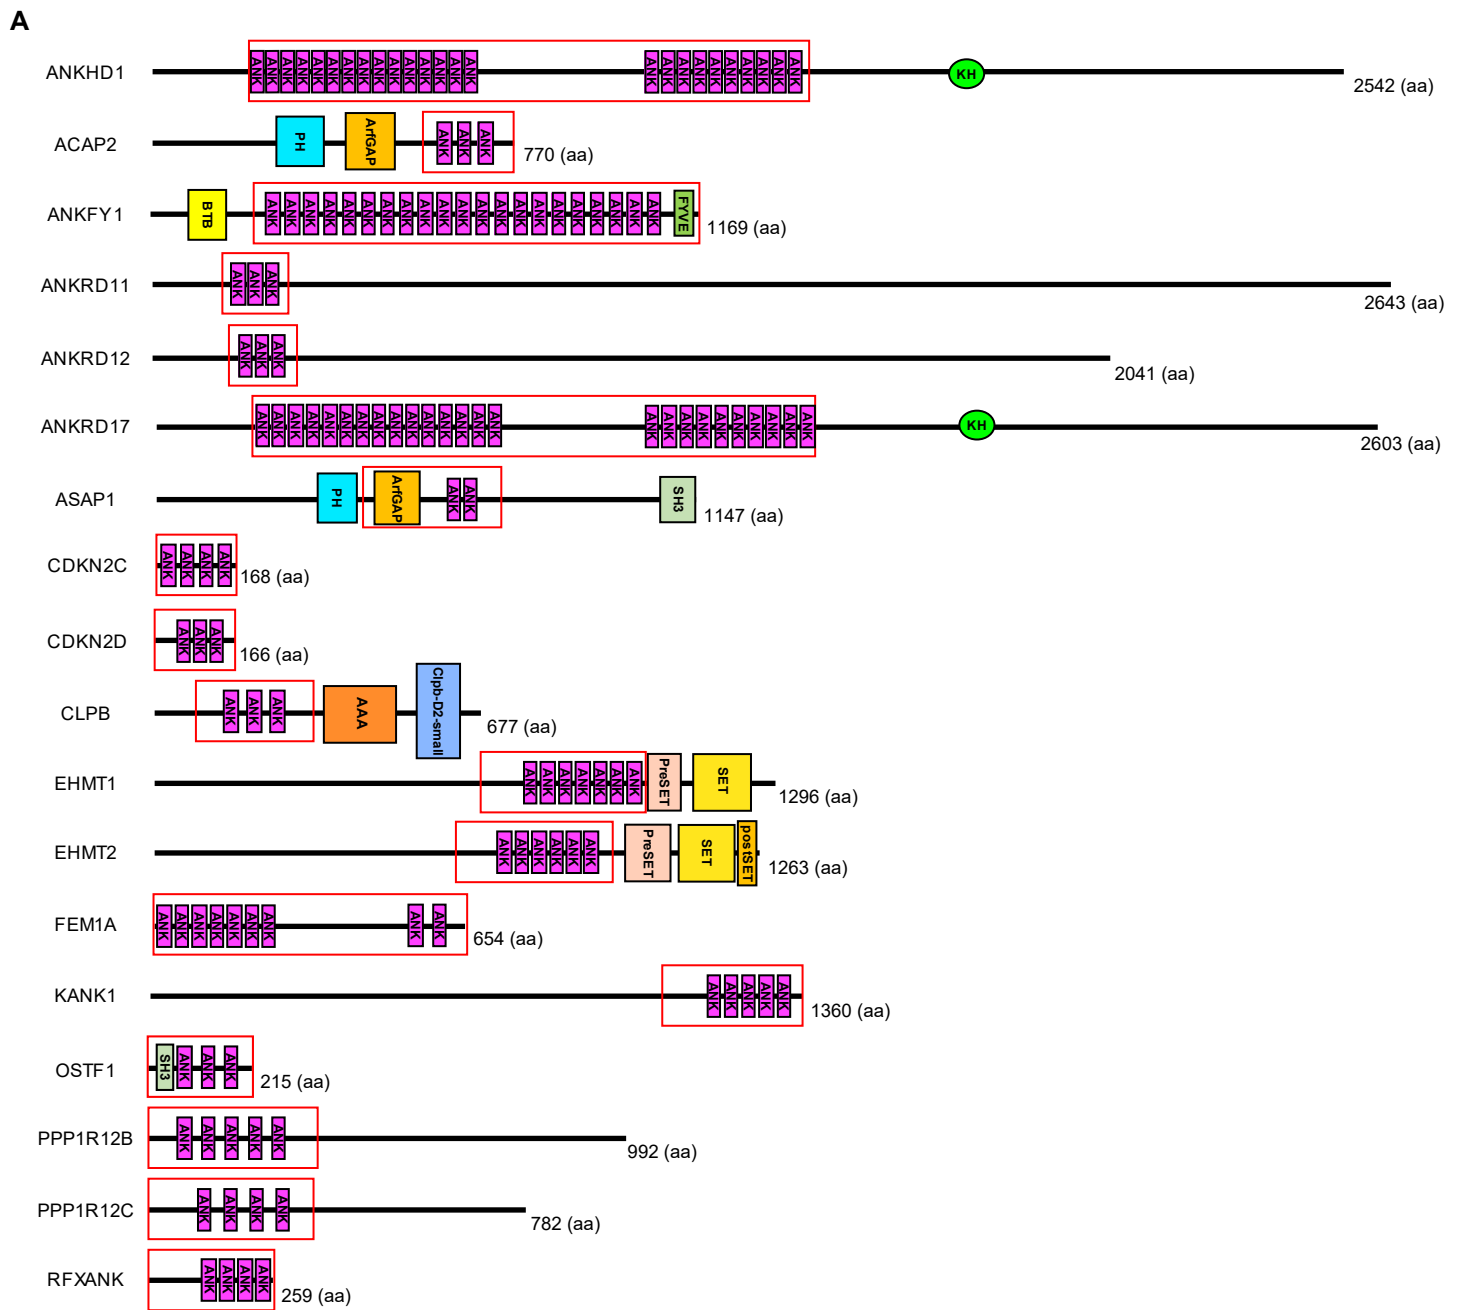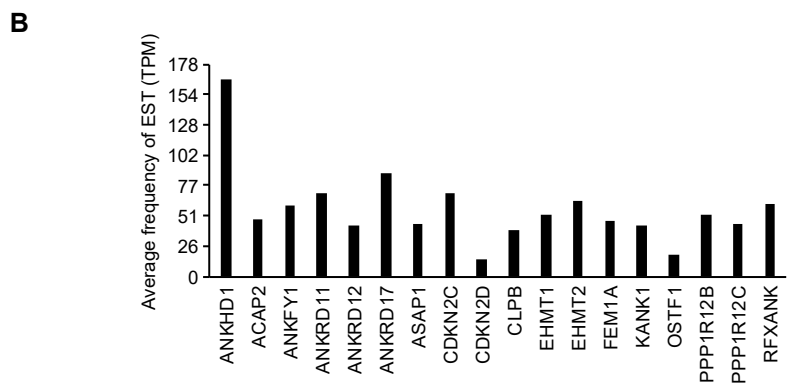

Figure S1

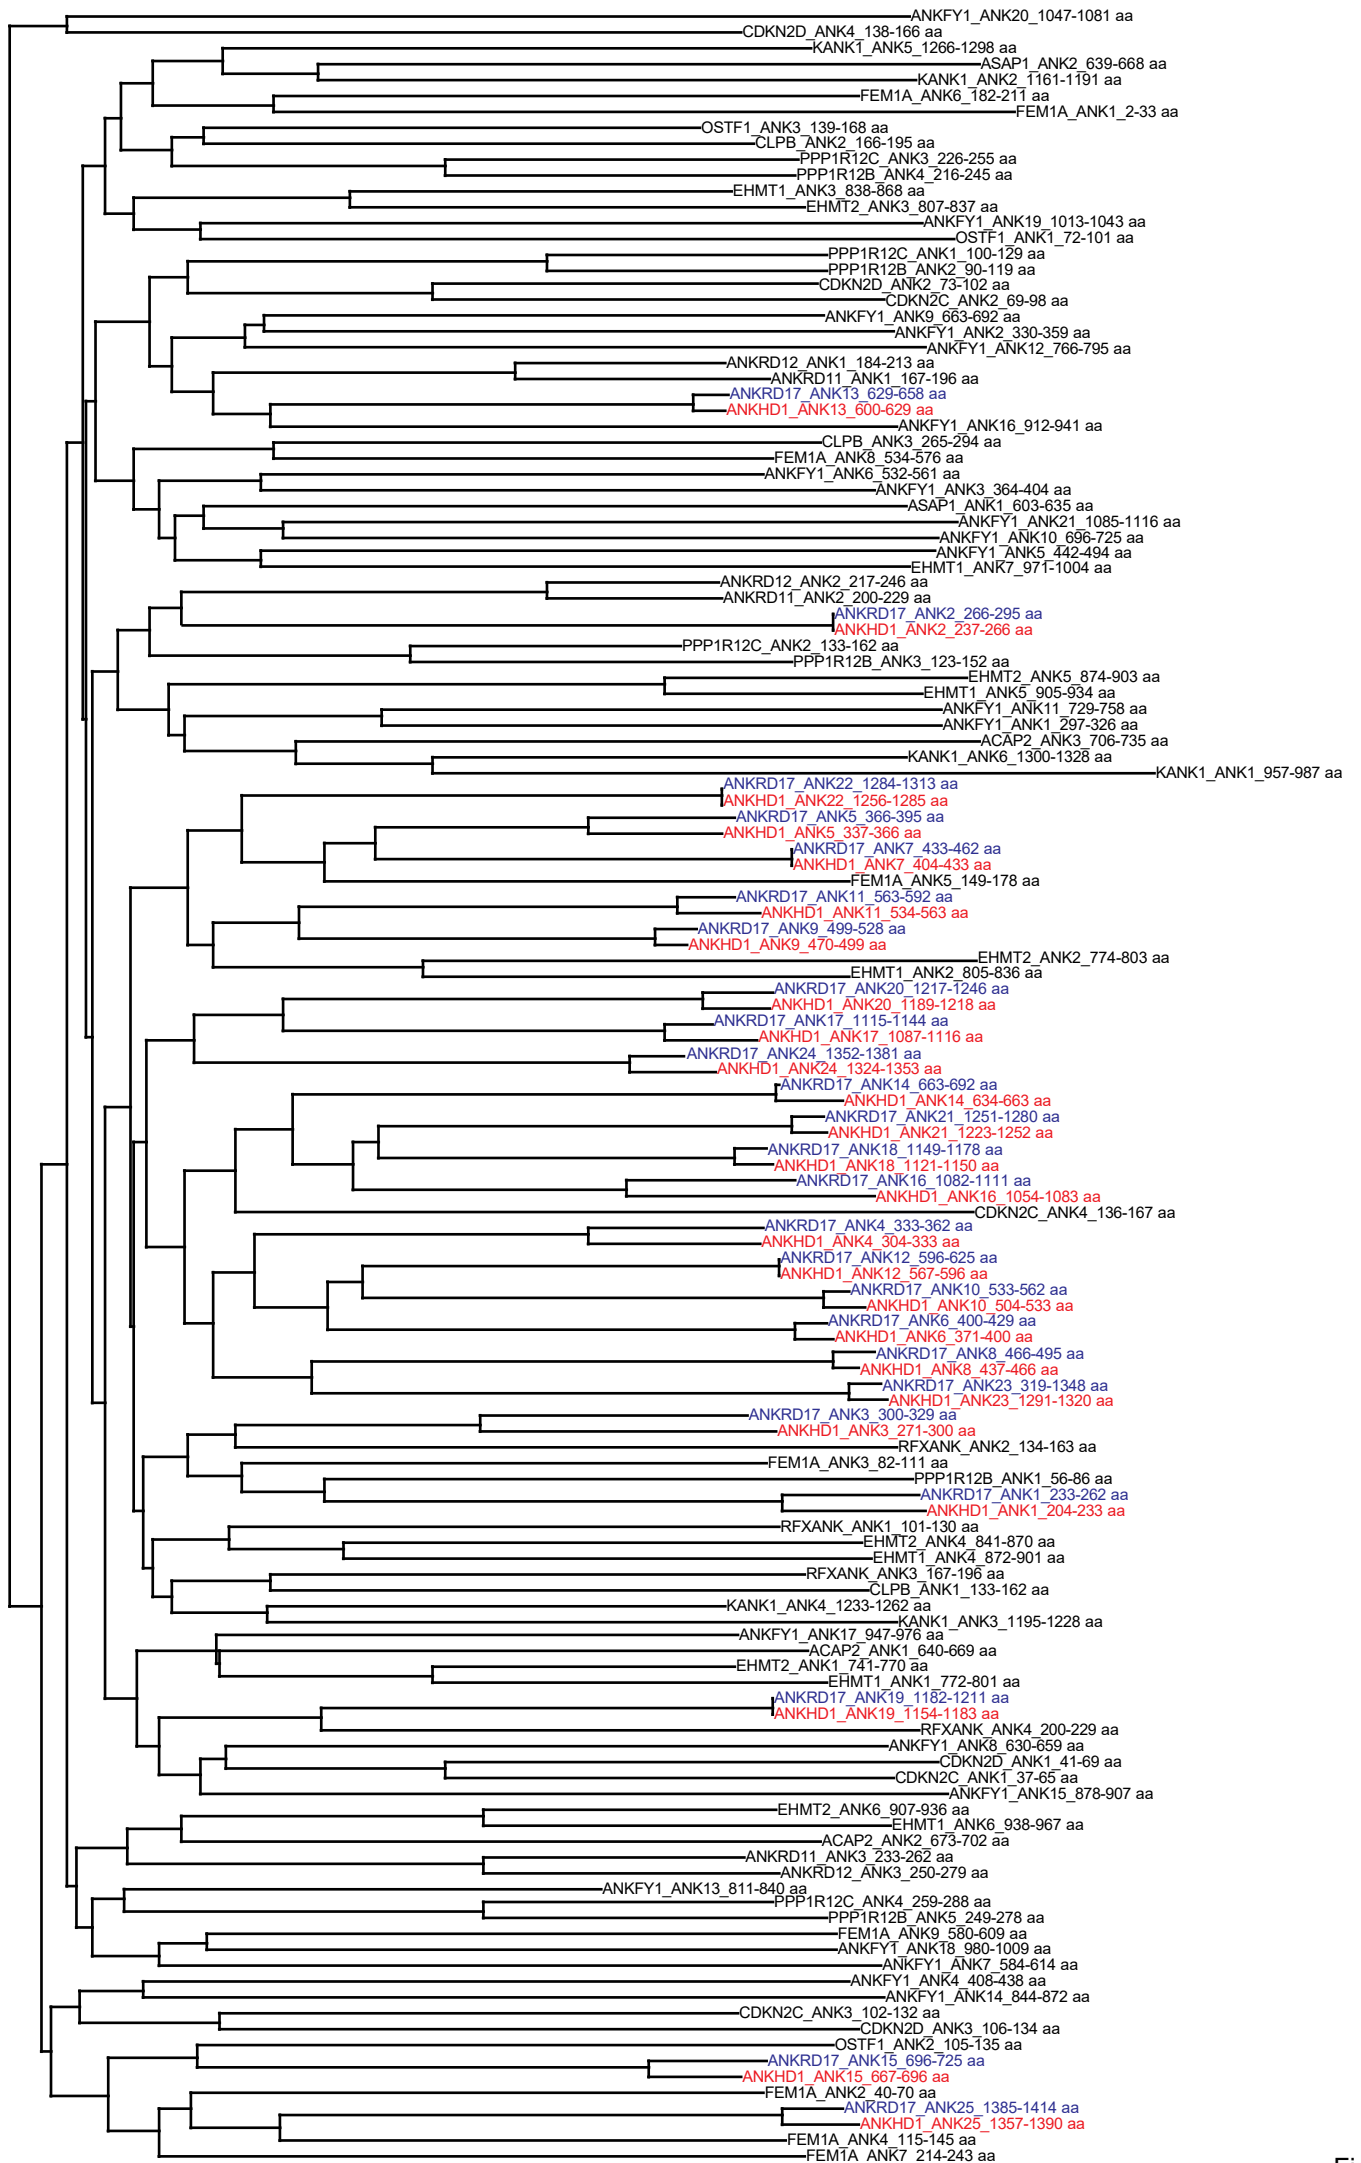

Figure S2

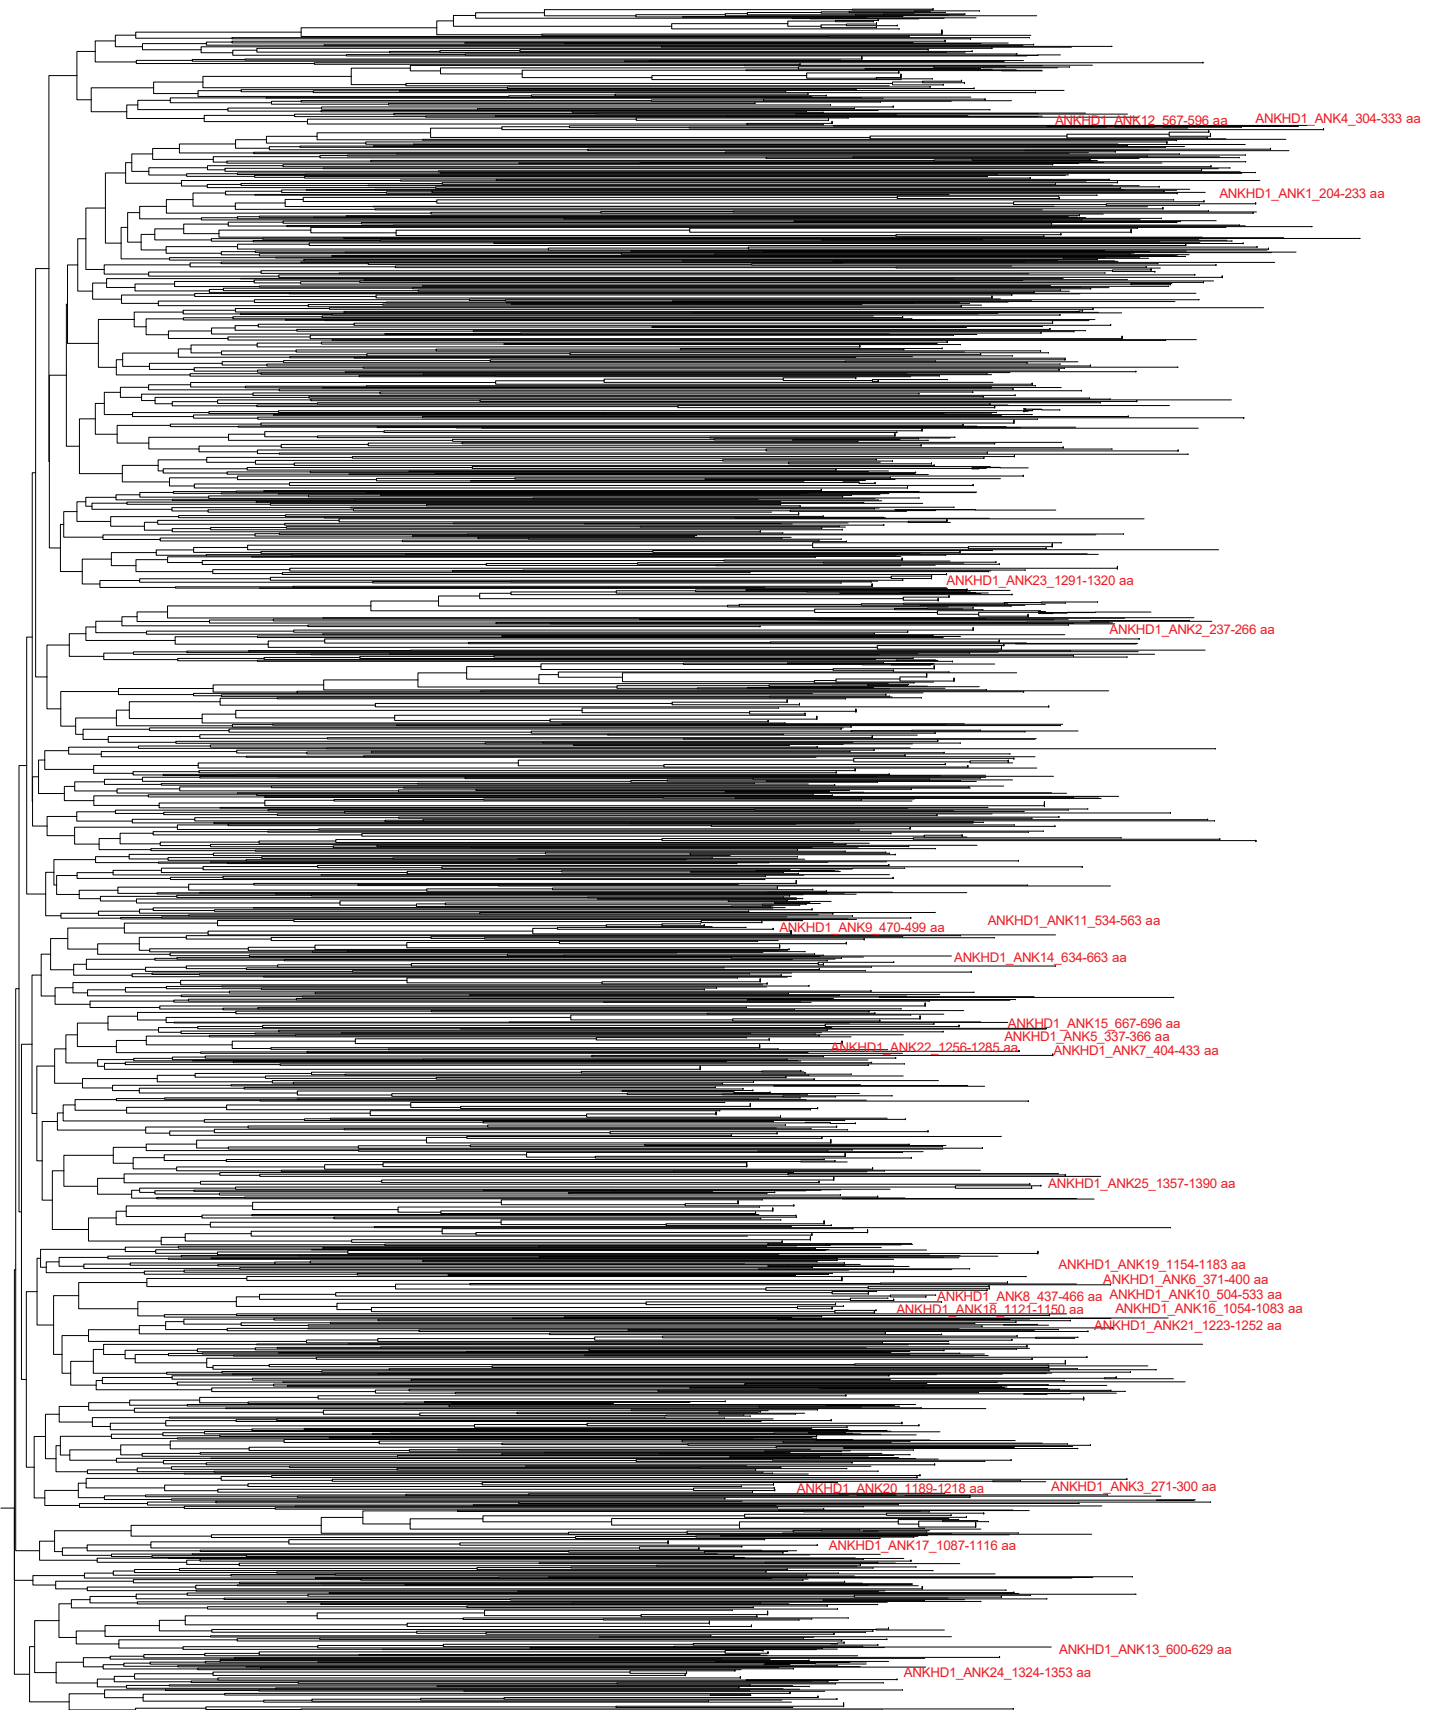

Figure S3

**A**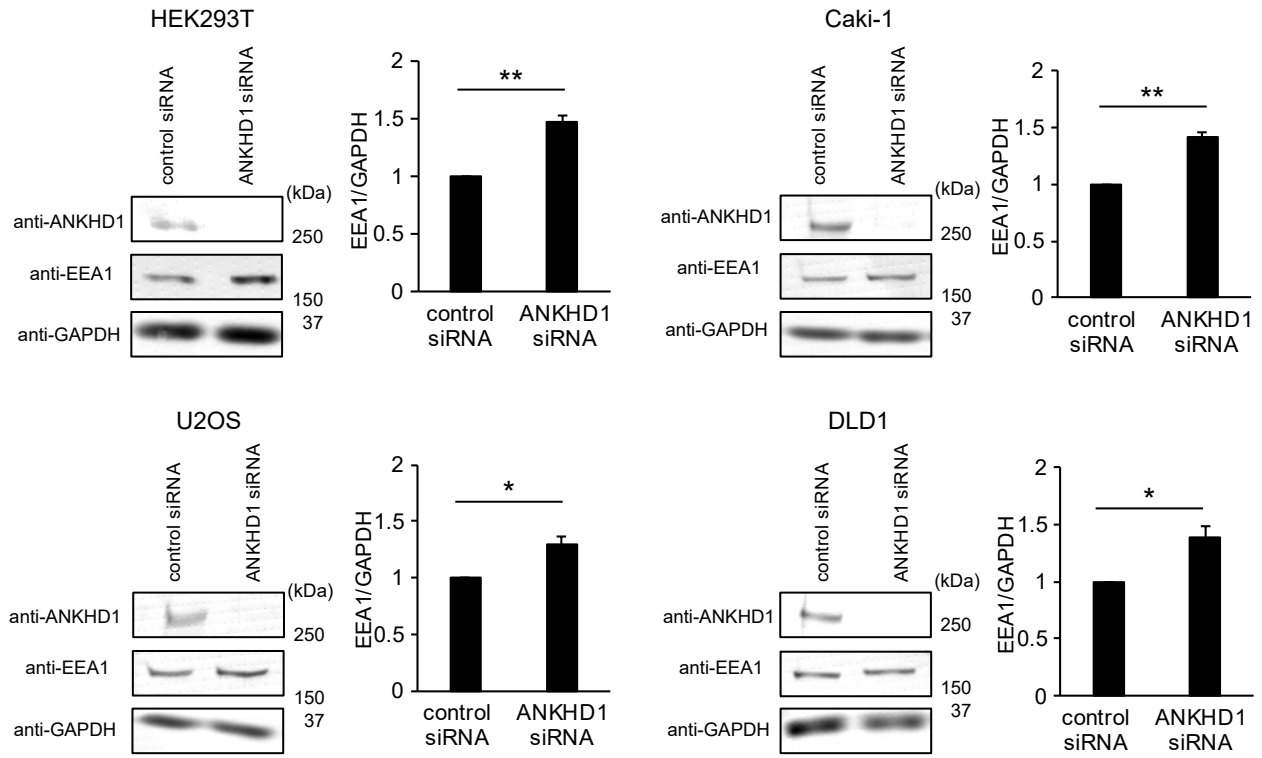**B**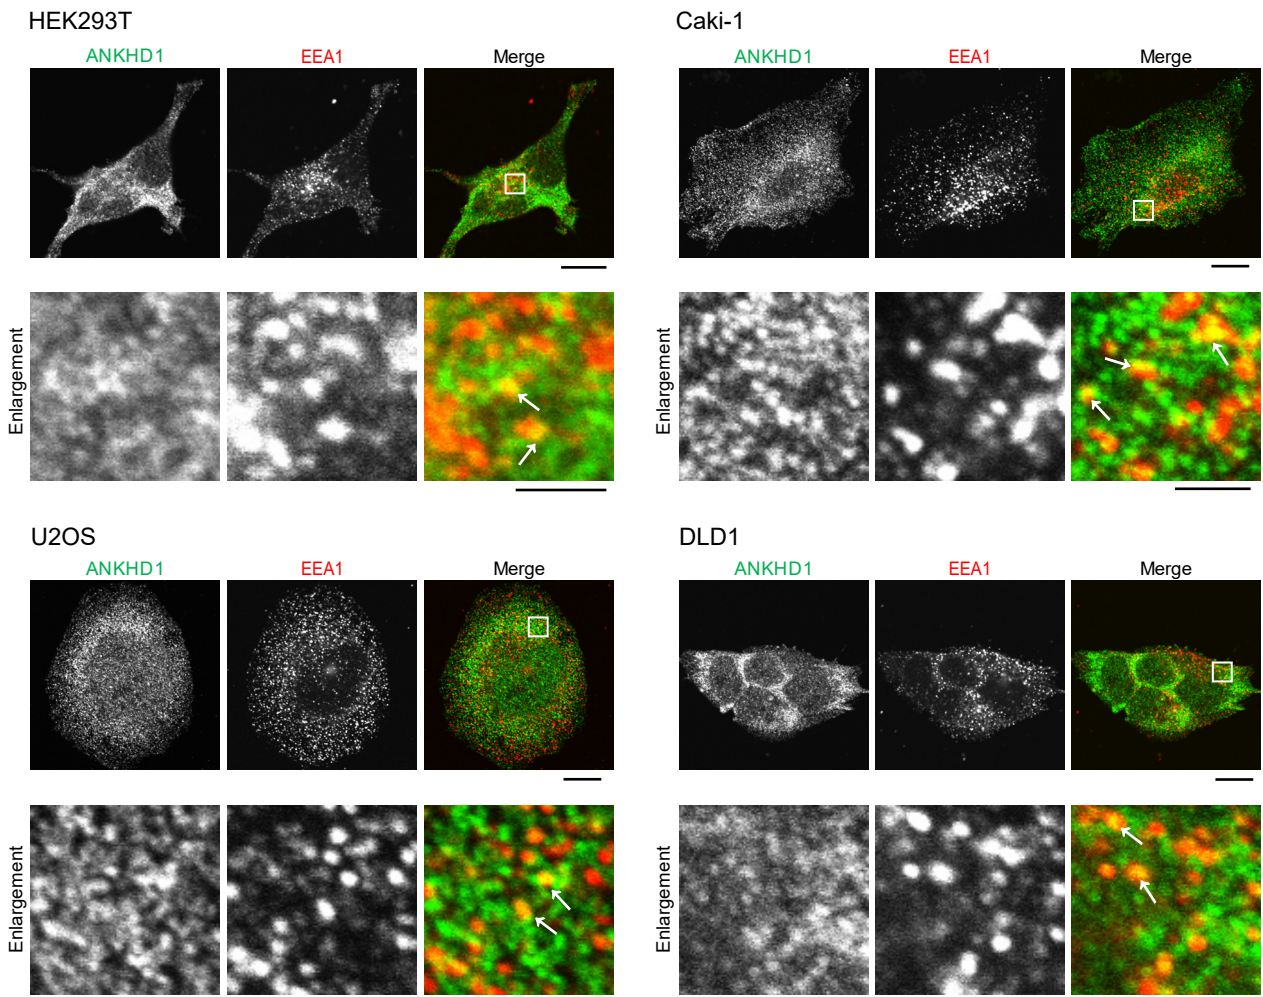

Figure S4



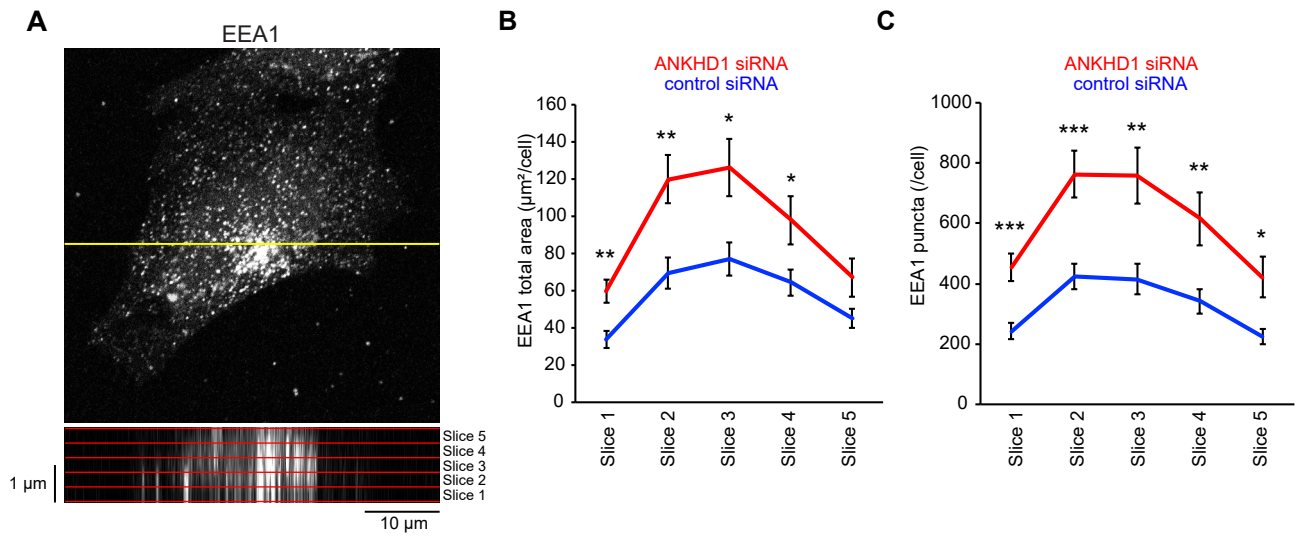

Figure S5

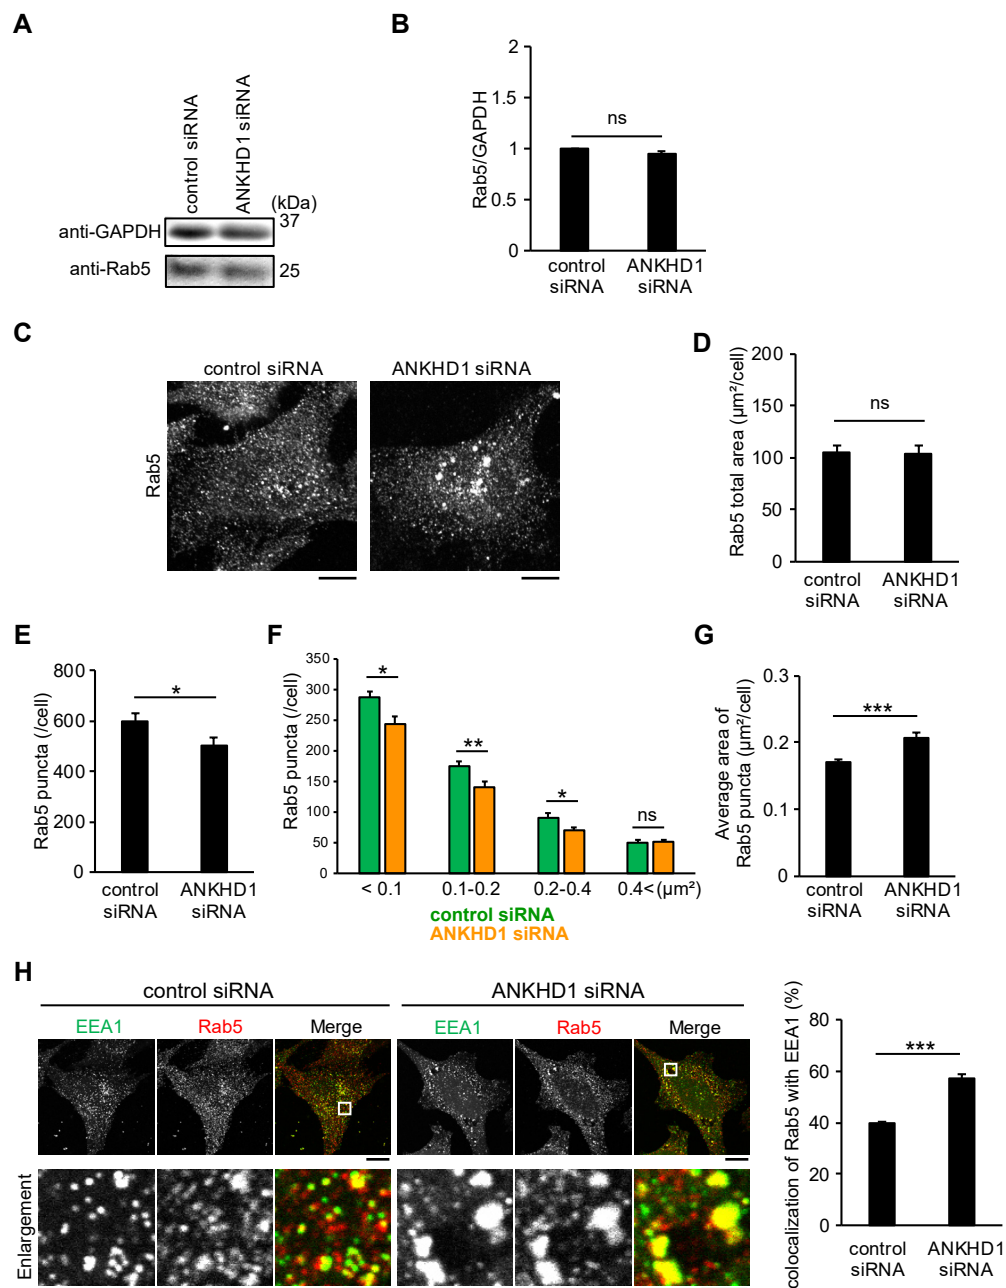

Figure S6

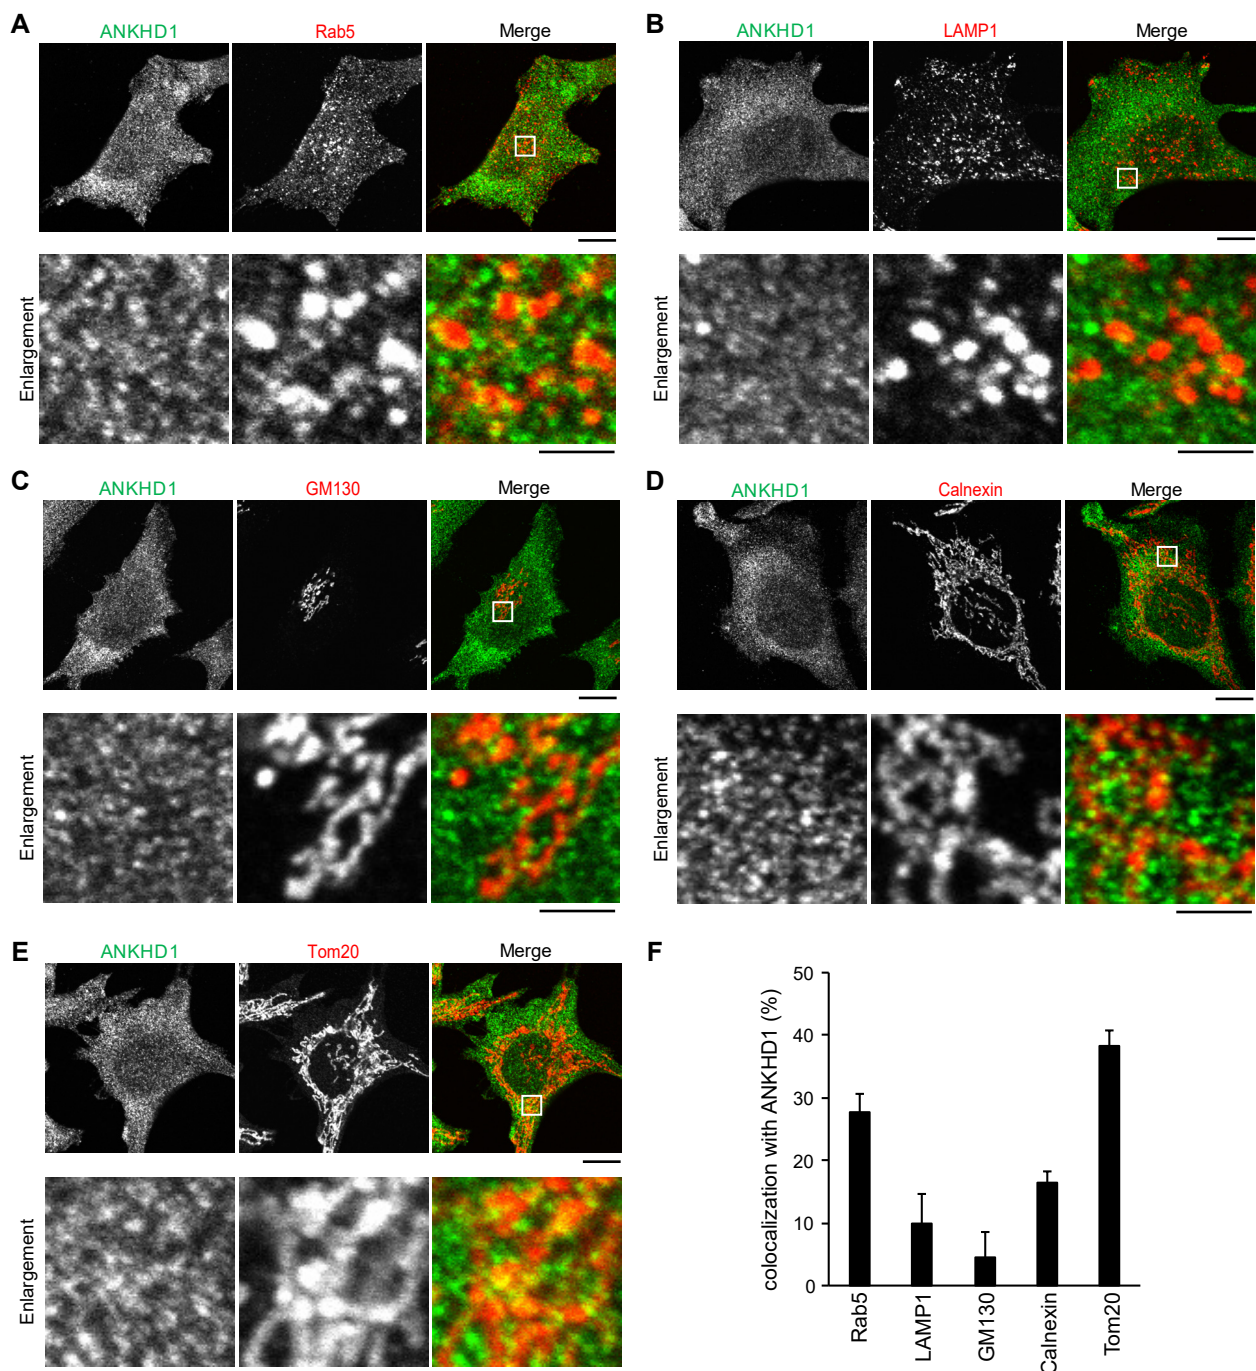

Figure S7

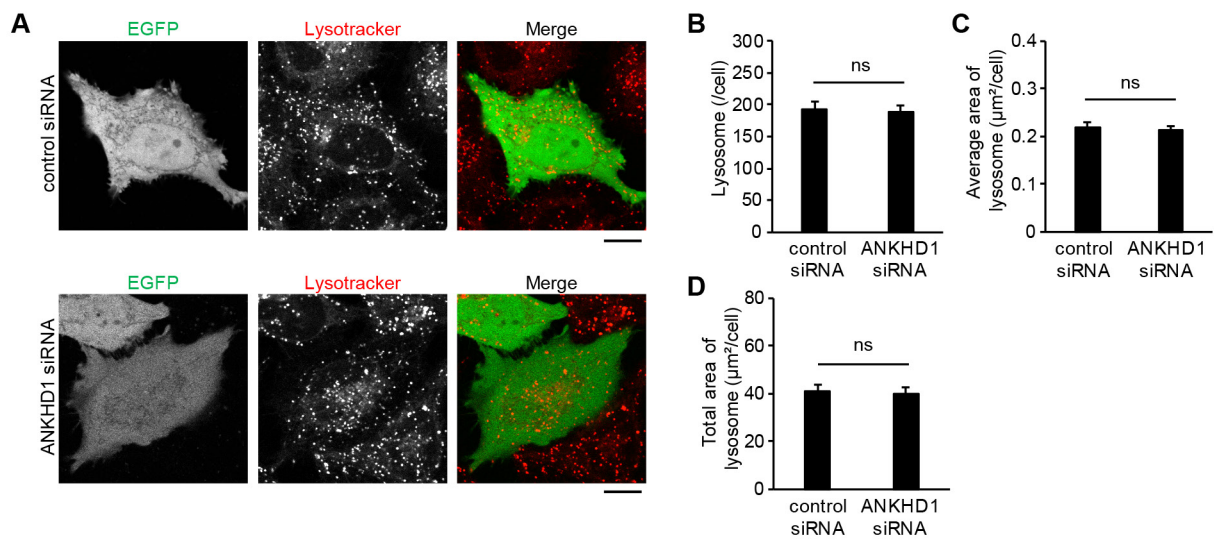

Figure S8

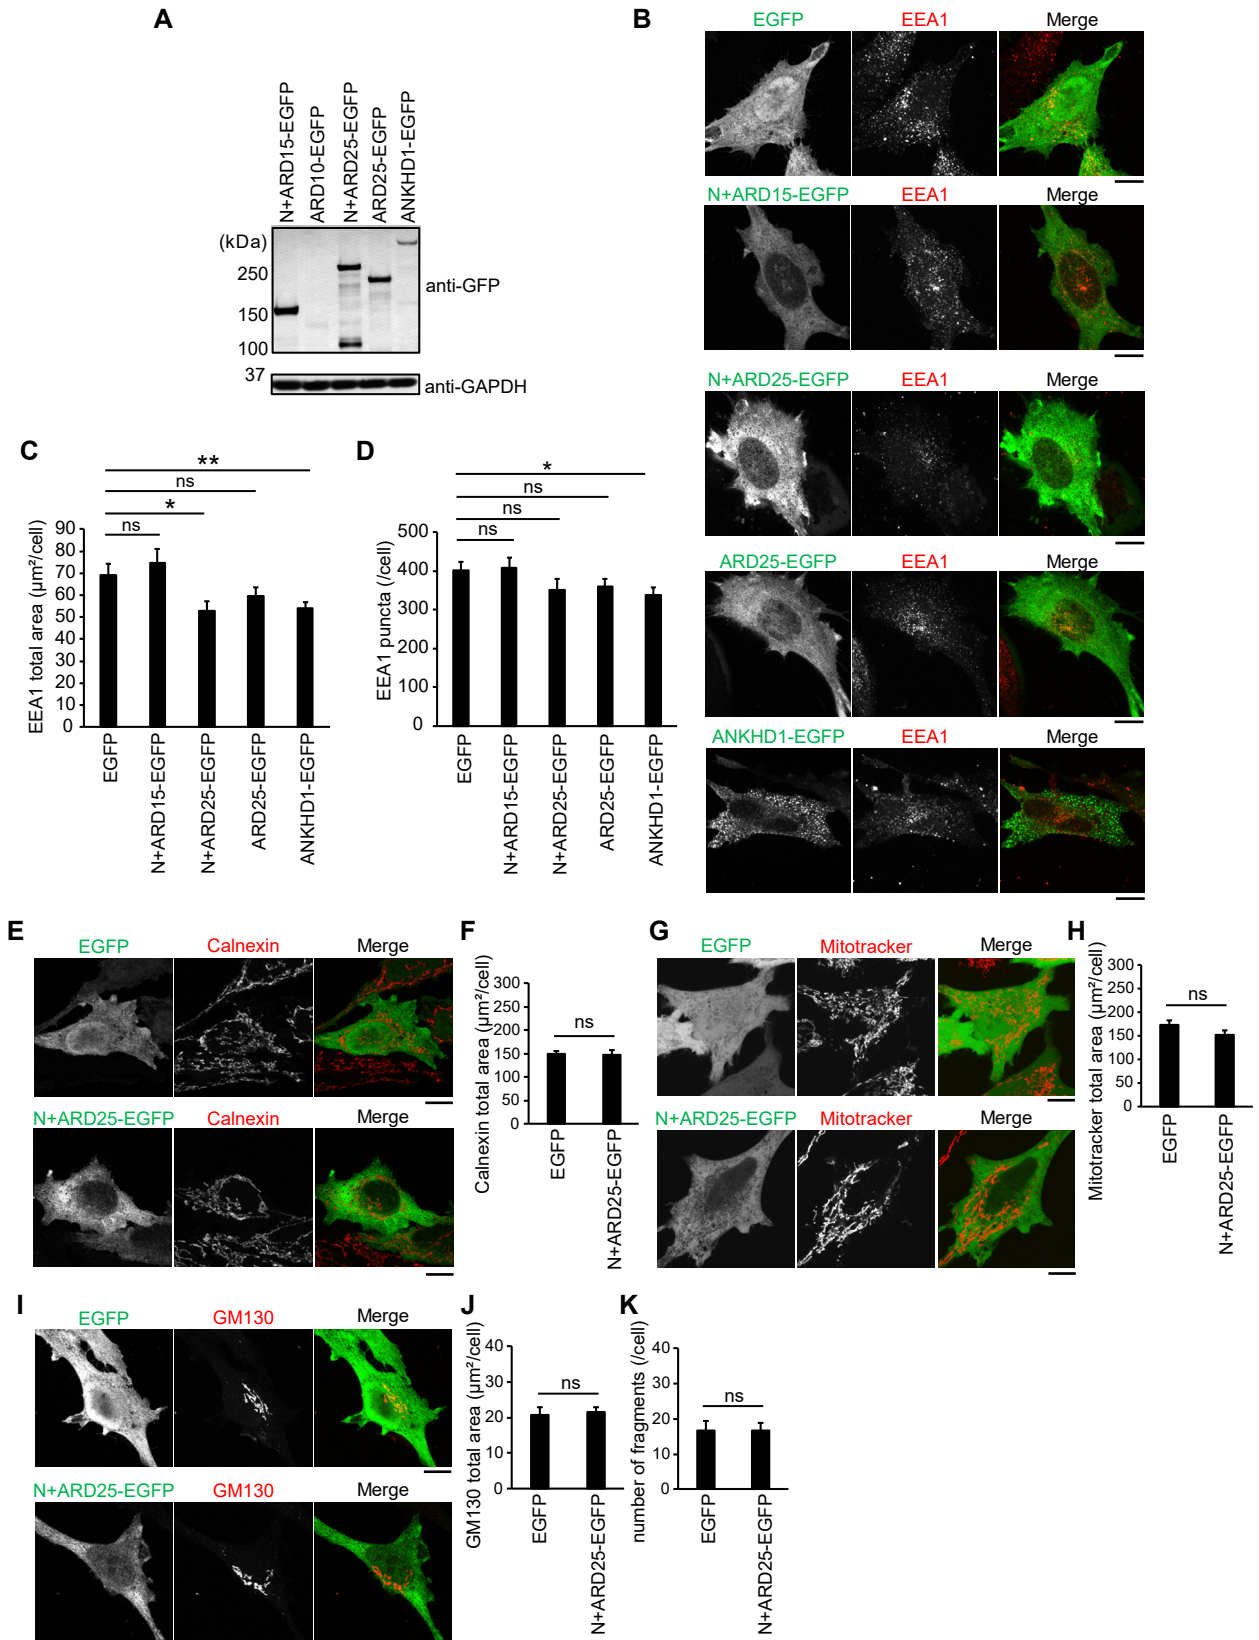

Figure S9

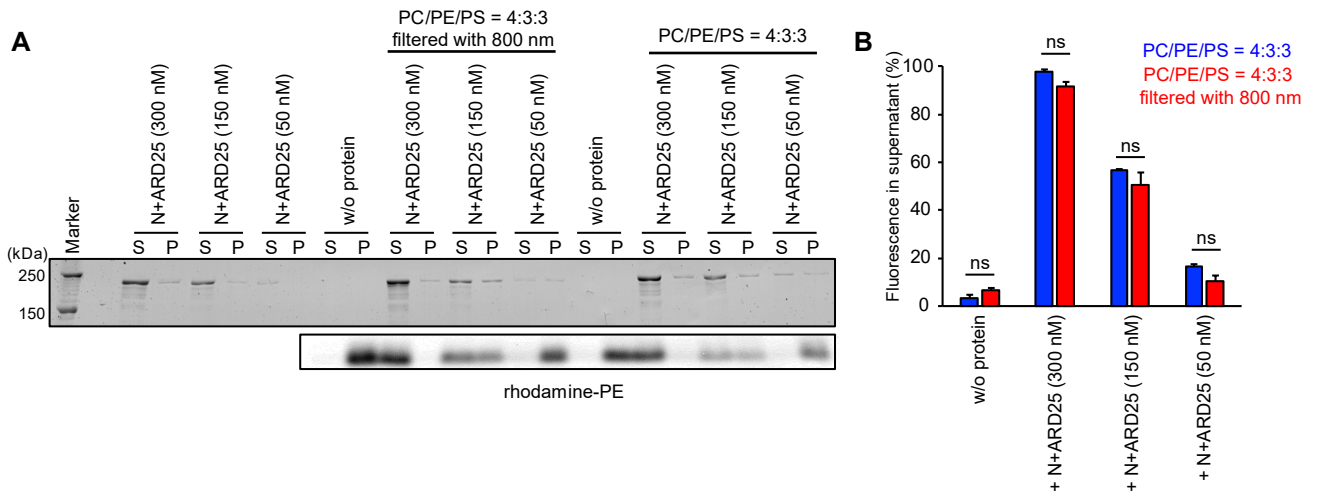

Figure S10



**A**

|                           |                                                                                                    |    |
|---------------------------|----------------------------------------------------------------------------------------------------|----|
| ANKHD1 ANK1 204-233 aa    | VDTRSLAEACSDGDVNAV RKLLDEGRSVNE                                                                    | 30 |
| ANKHD1 ANK2 237-266 aa    | EGE <del>S</del> LLCLACSAGYYELAQVLLAMHANVED                                                        | 30 |
| ANKHD1 ANK3 271-300 aa    | GDI <del>T</del> PLMAA <del>S</del> GGYL <del>I</del> VKLLLLHDADVNS                                | 30 |
| ANKHD1 ANK4 304-333 aa    | TGN <del>T</del> ALTYACAGGFV <del>I</del> VKVLLENGANI <del>E</del> D                               | 30 |
| ANKHD1 ANK5 337-366 aa    | NGH <del>T</del> PLMEASAGHVEVARVLLDHGAGI <del>N</del> T                                            | 30 |
| ANKHD1 ANK6 371-400 aa    | F <del>K</del> ESALTLACYK <del>G</del> HLD <del>M</del> VRFLLEAGADQ <del>E</del> H                 | 30 |
| ANKHD1 ANK7 404-433 aa    | EMHTALMEACMDGHVEVARLLLD <del>S</del> GAQVNM                                                        | 30 |
| ANKHD1 ANK8 437-466 aa    | SFES <del>P</del> LTLAACGGHVELAALLIERGANLEE                                                        | 30 |
| ANKHD1 ANK9 470-499 aa    | EGYT <del>P</del> LMEAAAREGHE <del>M</del> VALLL <del>A</del> QGANINA                              | 30 |
| ANKHD1 ANK10 504-533 aa   | TQETALTLACGGFSEVADFLIKAGADIE <del>L</del>                                                          | 30 |
| ANKHD1 ANK11 534-563 aa   | GCS <del>T</del> PLMEASQEGHLELVKYL <del>L</del> ASGANVHA                                           | 30 |
| ANKHD1 ANK12 567-596 aa   | TGDTALTYACENGHT <del>D</del> VADVLLQAGADLE <del>H</del>                                            | 30 |
| ANKHD1 ANK13 600-629 aa   | GGRT <del>P</del> LMKAARAGHLC <del>T</del> VQFLISKGANVNR                                           | 30 |
| ANKHD1 ANK14 634-663 aa   | NDHTV <del>V</del> SLACAGGHLAVV <del>E</del> LLLAHGAD <del>P</del> TH                              | 30 |
| ANKHD1 ANK15 667-696 aa   | DGS <del>T</del> MLIEAAKGGHTNVVSYLLDYPNNVLS                                                        | 30 |
| ANKHD1 ANK16 1054-1083 aa | NHDTALTLACAGGHELVSVLIARDAKIE <del>H</del>                                                          | 30 |
| ANKHD1 ANK17 1087-1116 aa | K <del>G</del> FT <del>P</del> LILAAATAGHVG <del>V</del> EILLDKGGDIEA                              | 30 |
| ANKHD1 ANK18 1121-1150 aa | T <del>K</del> DT <del>P</del> LSLACSGGRQEVVDLL <del>L</del> ARGANKE <del>H</del>                  | 30 |
| ANKHD1 ANK19 1154-1183 aa | SDYT <del>P</del> LSLAASGGYVNI <del>I</del> KILLNAGAEITNS                                          | 30 |
| ANKHD1 ANK20 1189-1218 aa | LGI <del>S</del> PLMLAAMNGHVP <del>A</del> VKLLLD <del>M</del> GS <del>D</del> INA                 | 30 |
| ANKHD1 ANK21 1223-1252 aa | N <del>R</del> NTALTLACFQGRA <del>E</del> VVSL <del>L</del> DRKANVE <del>H</del>                   | 30 |
| ANKHD1 ANK22 1256-1285 aa | TGL <del>T</del> PLMEASGGYAE <del>V</del> GRVLLDKGADVNA                                            | 30 |
| ANKHD1 ANK23 1291-1320 aa | S <del>R</del> DTALTIAADK <del>G</del> HYK <del>F</del> CELLIHRGAHIDV                              | 30 |
| ANKHD1 ANK24 1324-1353 aa | K <del>G</del> NT <del>P</del> LWLAS <del>N</del> GGHF <del>V</del> VVQLLVQAGADVDA                 | 30 |
| ANKHD1 ANK25 1357-1390 aa | R <del>K</del> ITPLMSAF <del>R</del> KGHVK <del>V</del> VQYLVKEVNQ <del>F</del> PS <del>I</del> EC | 34 |

**B**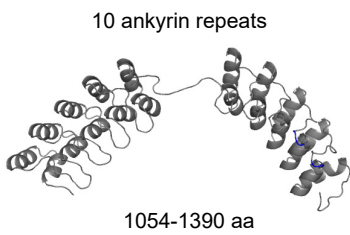**C**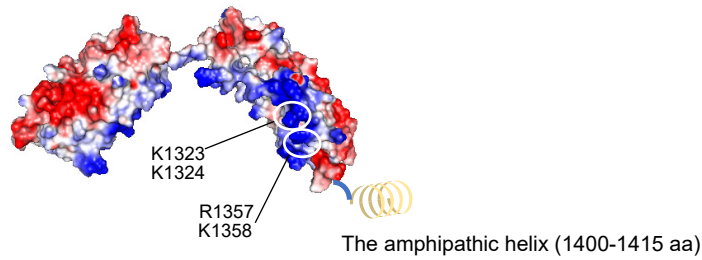**D**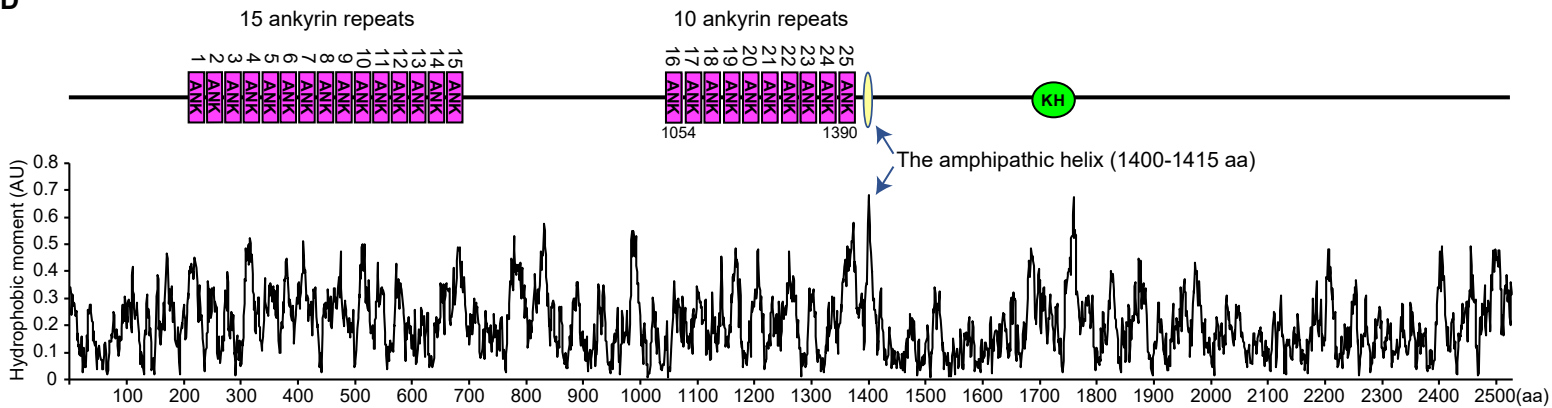**E**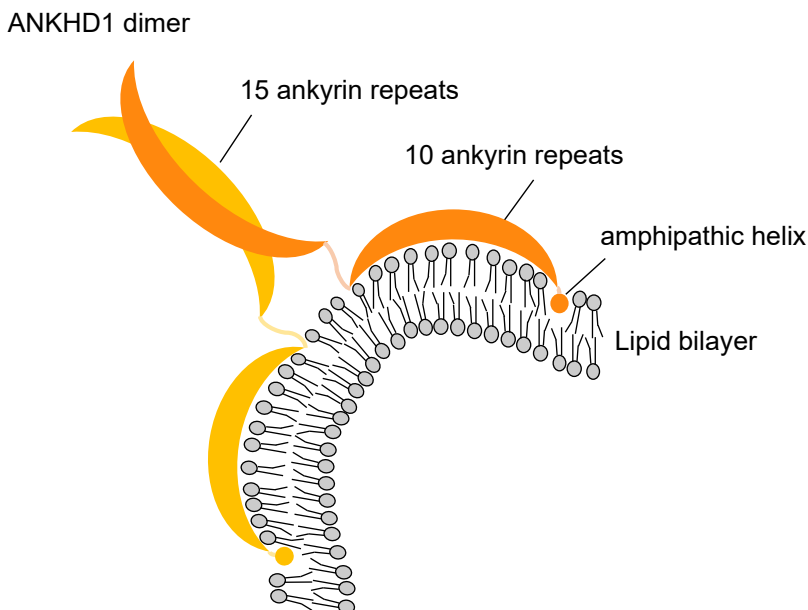

Supplement: mmc1.pdf [file mmc1.pdf]
